# Supplementary material
Source: publisher figshare collection journal article supplement (https://acs.figshare.com/ndownloader/files/13746602)
Supplement: Supplementary file 1 [file 13746602]

# Supporting Information

## *In-situ* Creation of SERS Active Au-AuO<sub>x</sub> Nanostructures through Electrochemical Process for Pigments Detection

Hsiao-Chien Chen<sup>†,‡</sup>, Ching-Hsiang Chen<sup>†</sup>, Chia-Shuo Hsu<sup>†</sup>, Tai-Lung Chen<sup>†</sup>, Mei-Yi Liao<sup>#,\*</sup>

Chia-Ching Wang<sup>†</sup>, Chia-Fen Tsai<sup>§,\*</sup> and Hao Ming Chen<sup>†,\*</sup>

<sup>†</sup> Department of Chemistry, National Taiwan University, 1, Sec. 4, Roosevelt Rd., Taipei 106, Taiwan

<sup>‡</sup> Center of Applied Nanomedicine, National Cheng Kung University, 35, Xiaodong Rd., North Dist., Tainan 704, Taiwan

<sup>†</sup> Sustainable Energy Development Center, National Taiwan University of Science and Technology, 43, Sec. 4, Keelung Rd., Taipei 106, Taiwan

<sup>#</sup> Department of Applied Chemistry, National Pingtung University, 1, Linsen Rd., Pingtung 900, Taiwan

<sup>§</sup> Taiwan Food and Drug Administration, 161-2, Kunyang St, Nangang District, Taipei 115, Taiwan

\*Author to whom correspondence should be addressed Mei-Yi Liao E-mail: [myliao@mail.nptu.edu.tw](mailto:myliao@mail.nptu.edu.tw), Chia-Fen Tsai E-mail: [tsaicf518@fda.gov.tw](mailto:tsaicf518@fda.gov.tw) and Hao Ming Chen E-mail: [haomingchen@ntu.edu.tw](mailto:haomingchen@ntu.edu.tw).

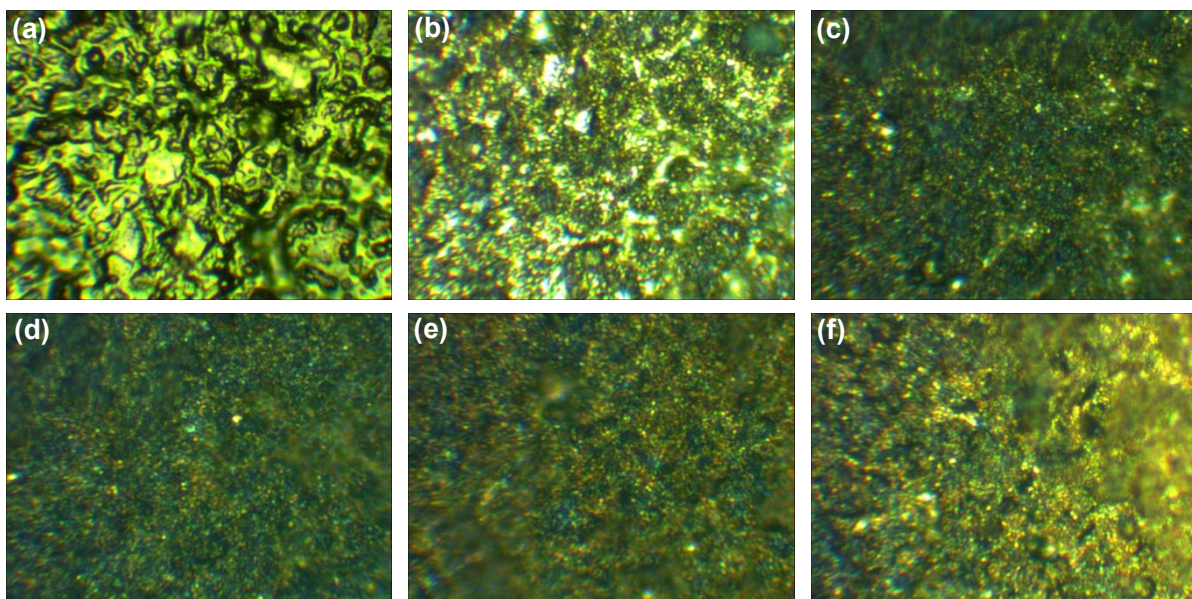

**Figure S1.** Images of optical microscopy of SPE-Au corresponding to different reverse rate in the area of  $100 \times 100 \mu\text{m}^2$ . (a) SPE-Au, (b) SPE-Au200, (c) SPE-Au100, (d) SPE-Au50, (e) SPE-Au25 and (f) SPE-Au5.

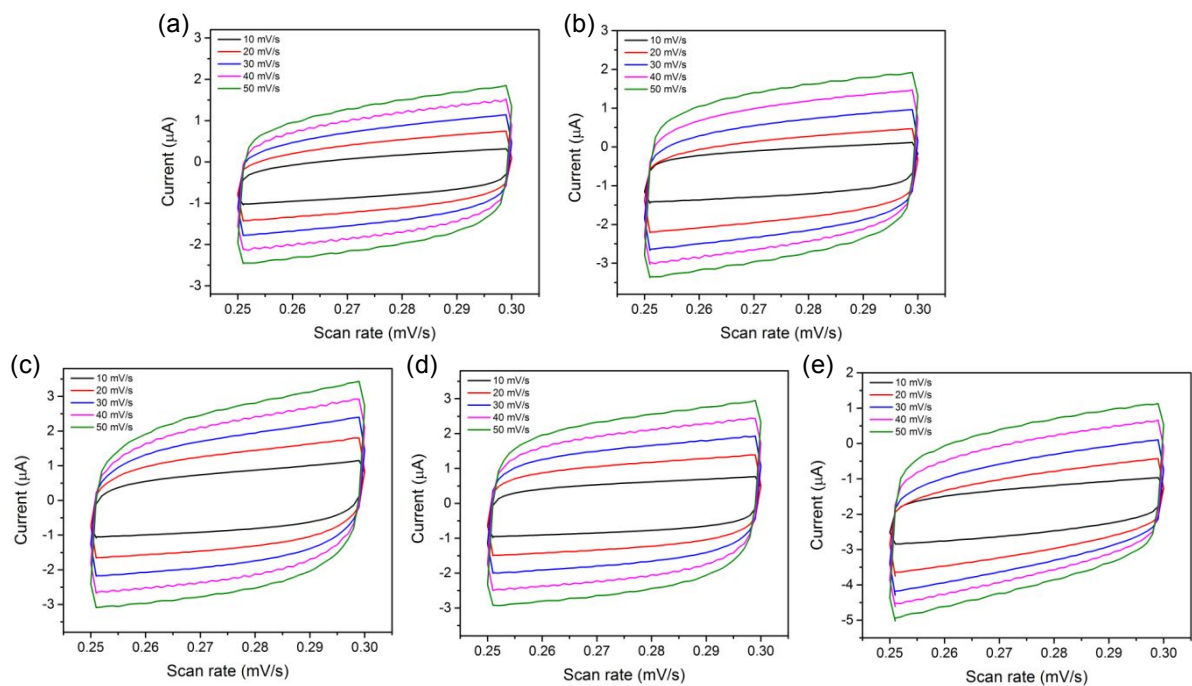

**Figure S2.** CVs in the potential range of Faradaic silence with various scan rates for (a) SPE-Au200, (b) SPE-Au100, (c) SPE-Au50, (d) SPE-Au25 and (e) SPE-Au5.

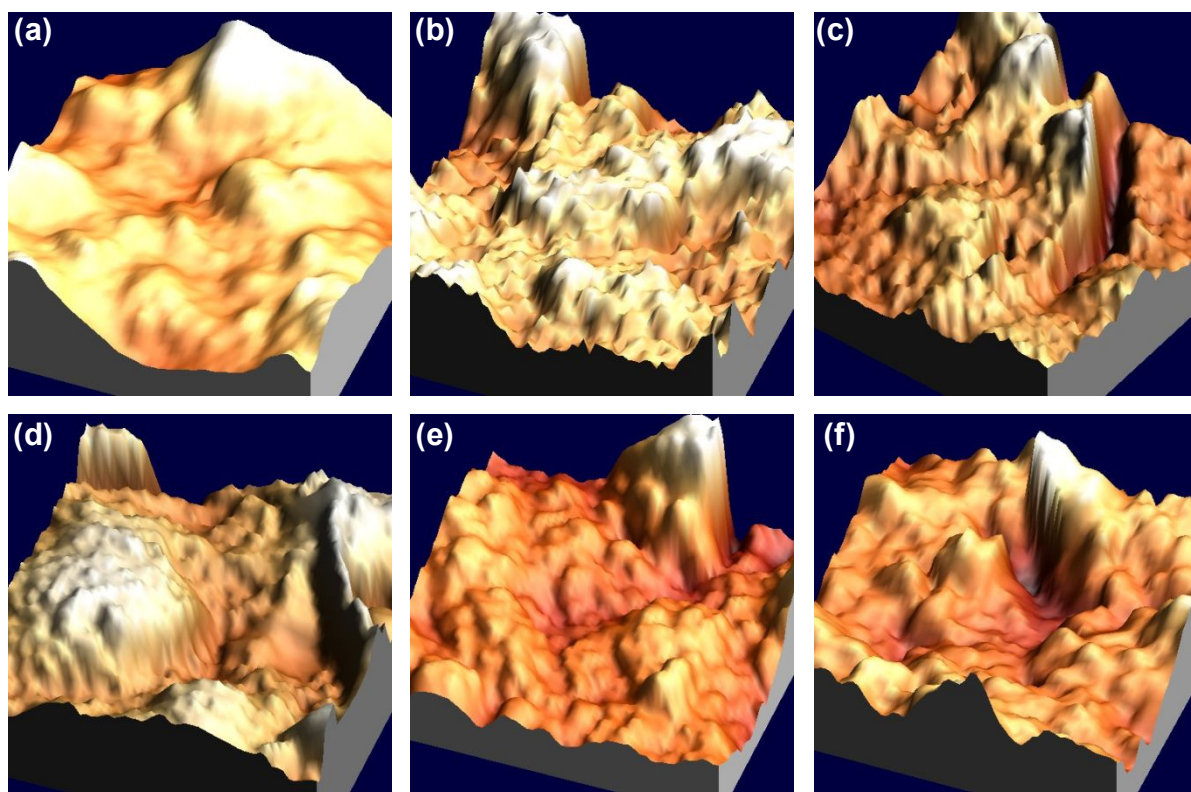

**Figure S3.** AFM images of SPE-Au corresponding to different reverse rates within the area of  $20 \times 20 \mu\text{m}^2$ . (a) SPE-Au, (b) SPE-Au200, (c) SPE-Au100, (d) SPE-Au50, (e) SPE-Au25 and (f) SPE-Au5.

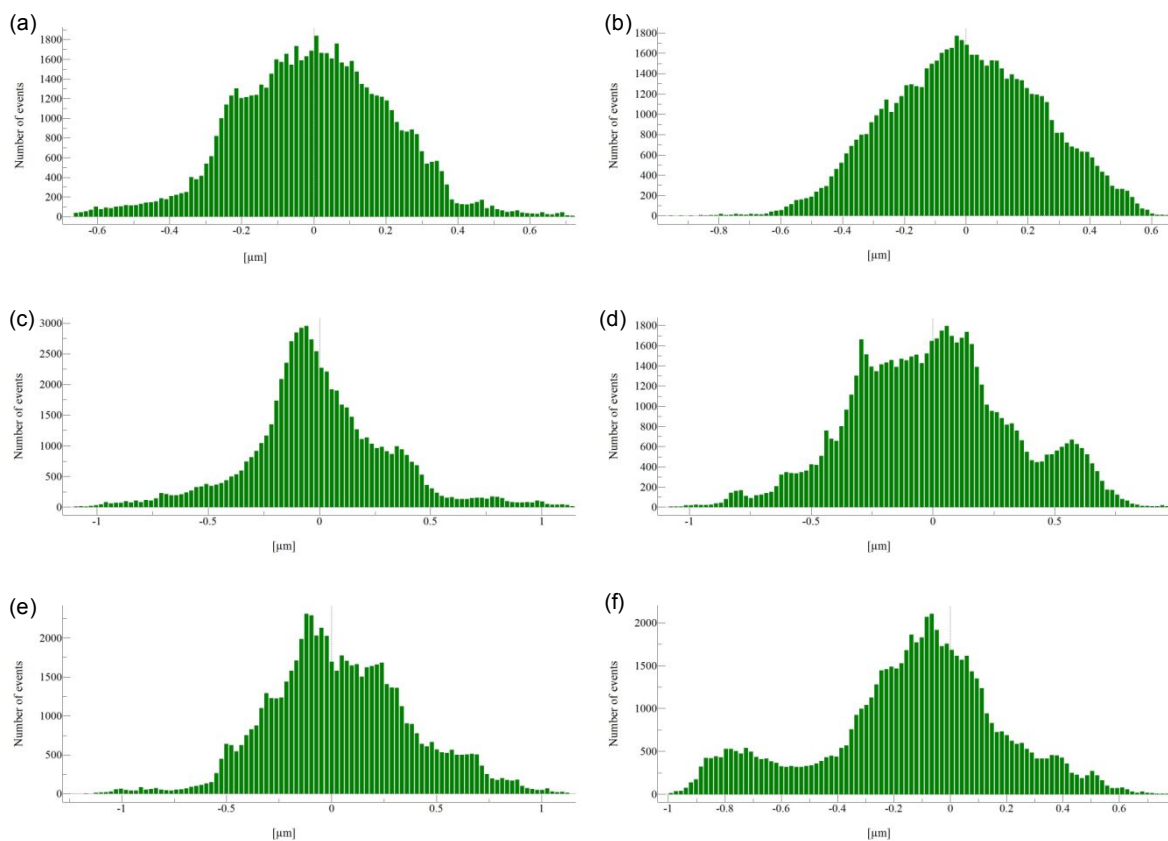

**Figure S4.** Histograms of the distribution of particle size to different reverse rate within the area of  $20 \times 20 \mu\text{m}^2$ . (a) SPE-Au, (b) SPE-Au200, (c) SPE-Au100, (d) SPE-Au50, (e) SPE-Au25 and (f) SPE-Au5.

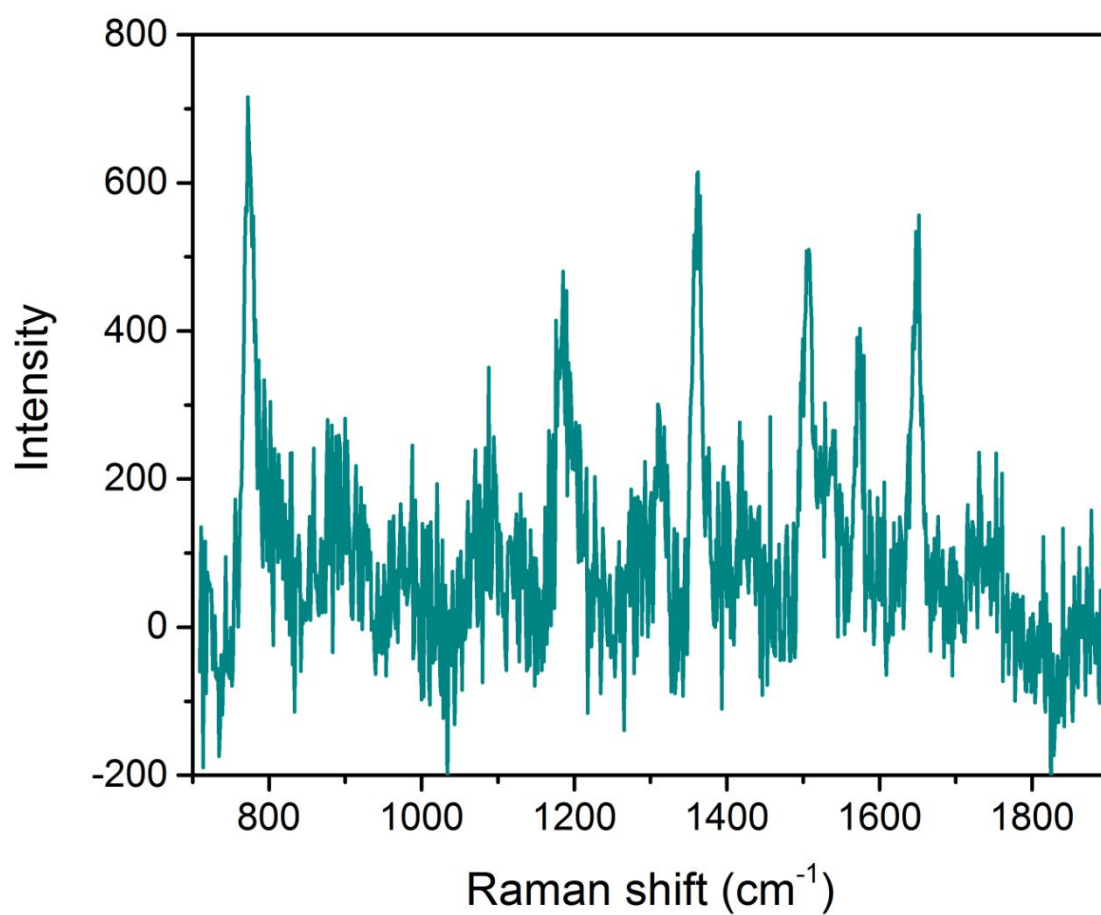

**Figure S5.** Raman spectra of ceramic substrate after adsorbing 0.1 M of R6G.

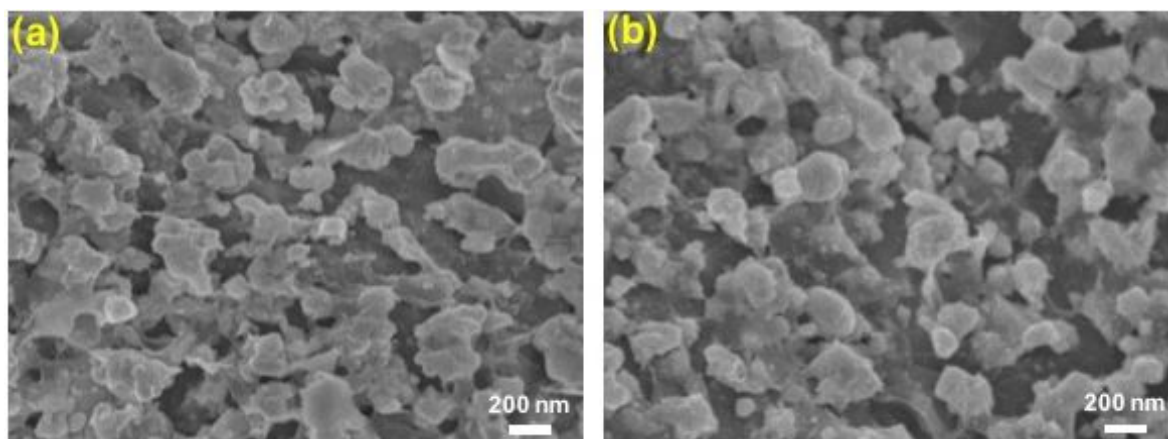

**Figure S6.** SEM images of SPE-Au25 substrates from others two different batches.

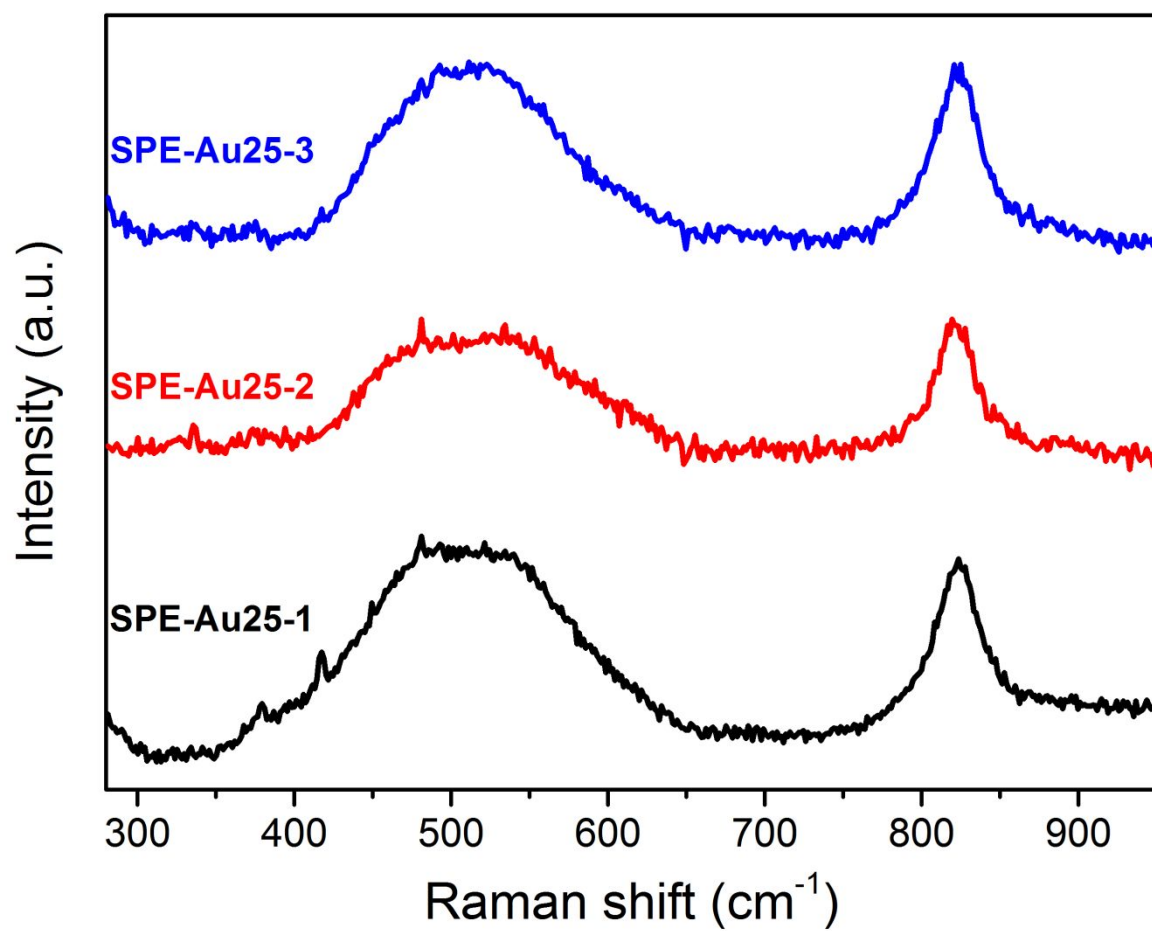

**Figure S7.** Raman spectra of three SPE-Au25 substrates from three different batches.

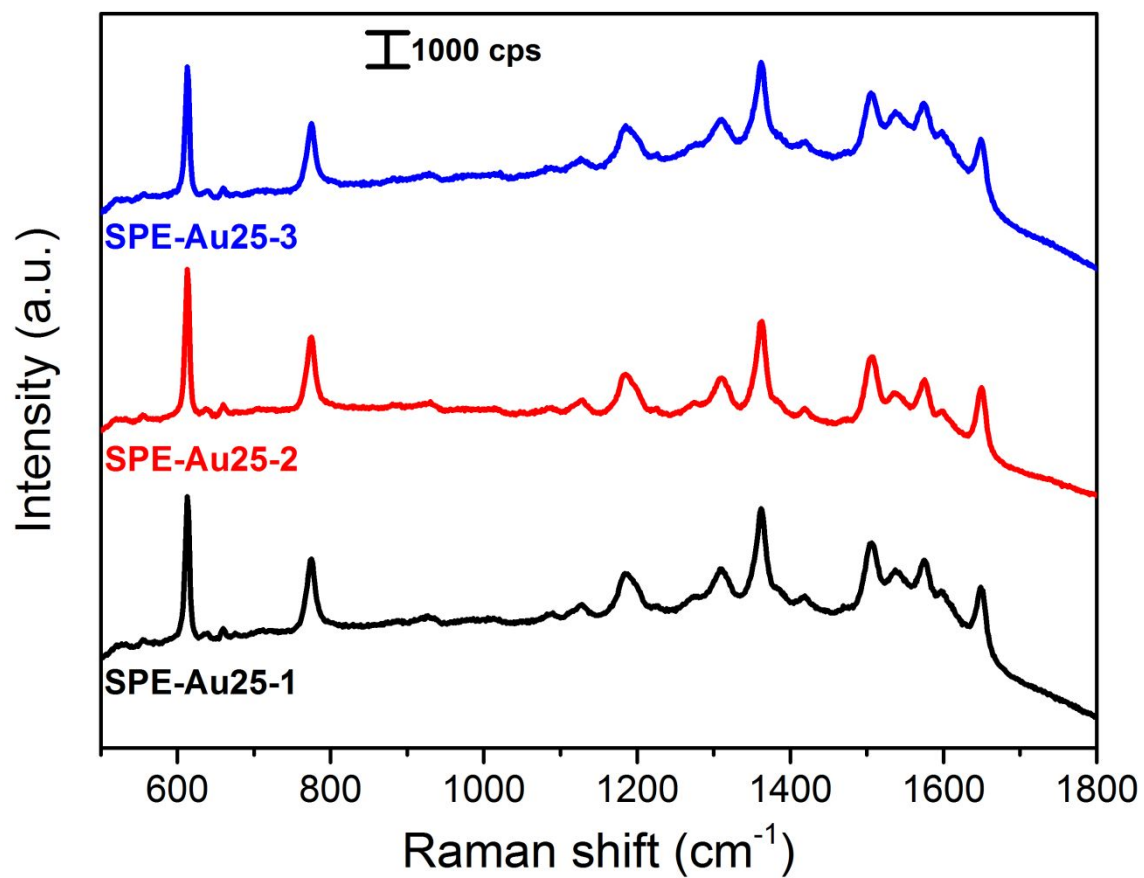

**Figure S8.** Raman spectra of R6G (10<sup>-6</sup> M) from three different batches of SPE-Au25 substrates.

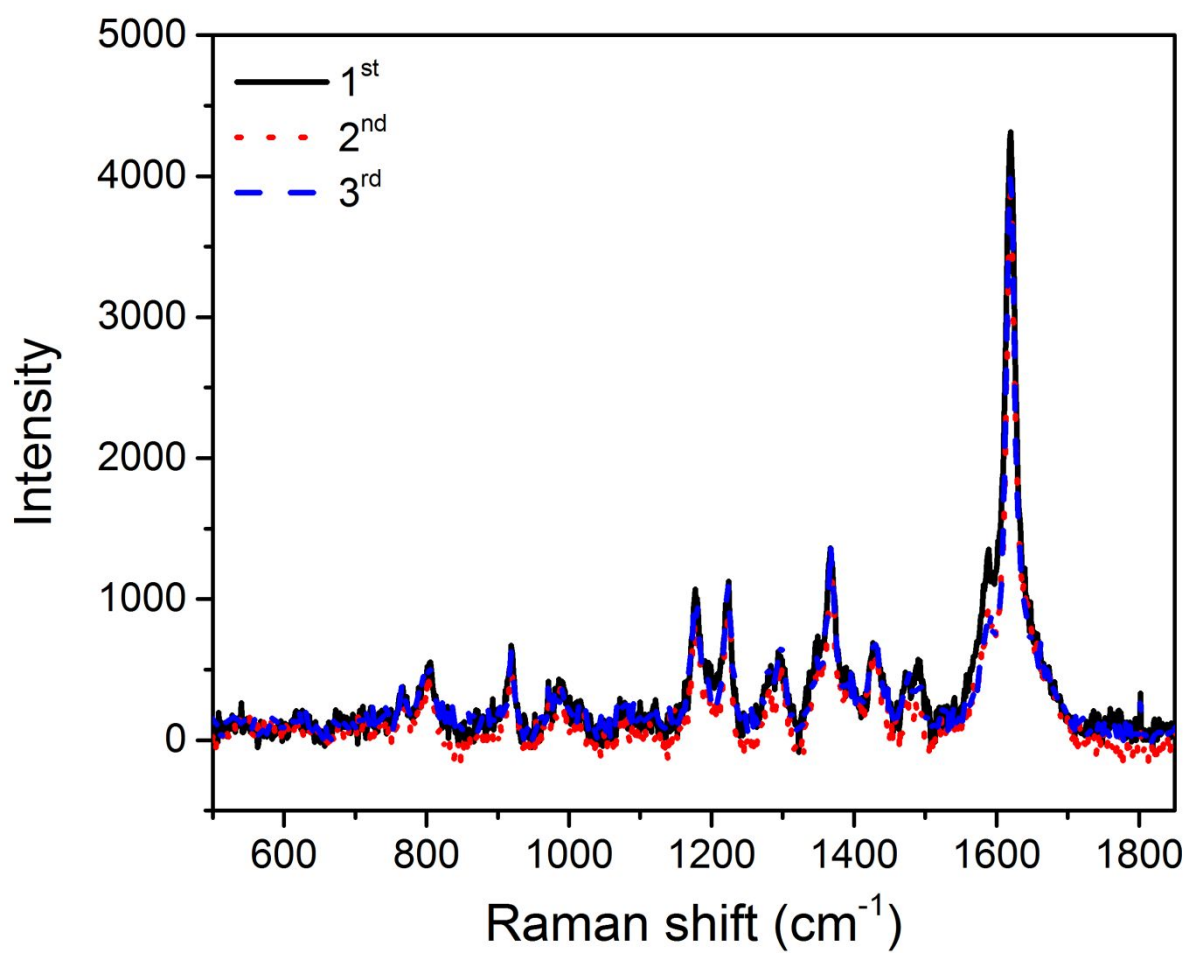

**Figure S9.** SERS spectra of BBF ( $10^{-6}$  M) from SPE-Au25 substrate for three individually measurements.

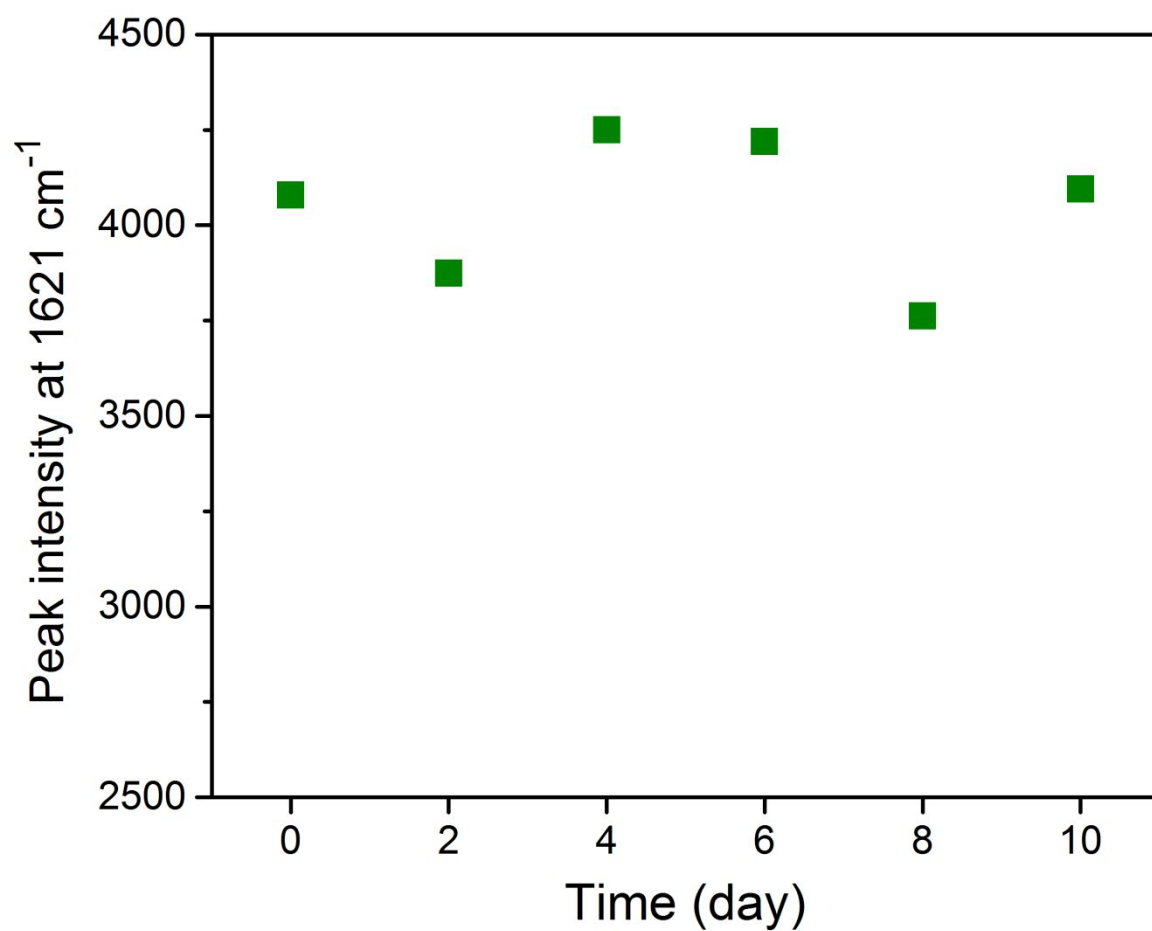

**Figure S10.** Variation of peak intensity at 1621 cm<sup>-1</sup> of BBF (10<sup>-6</sup> M) from SPE-Au25 substrate within 10 days.

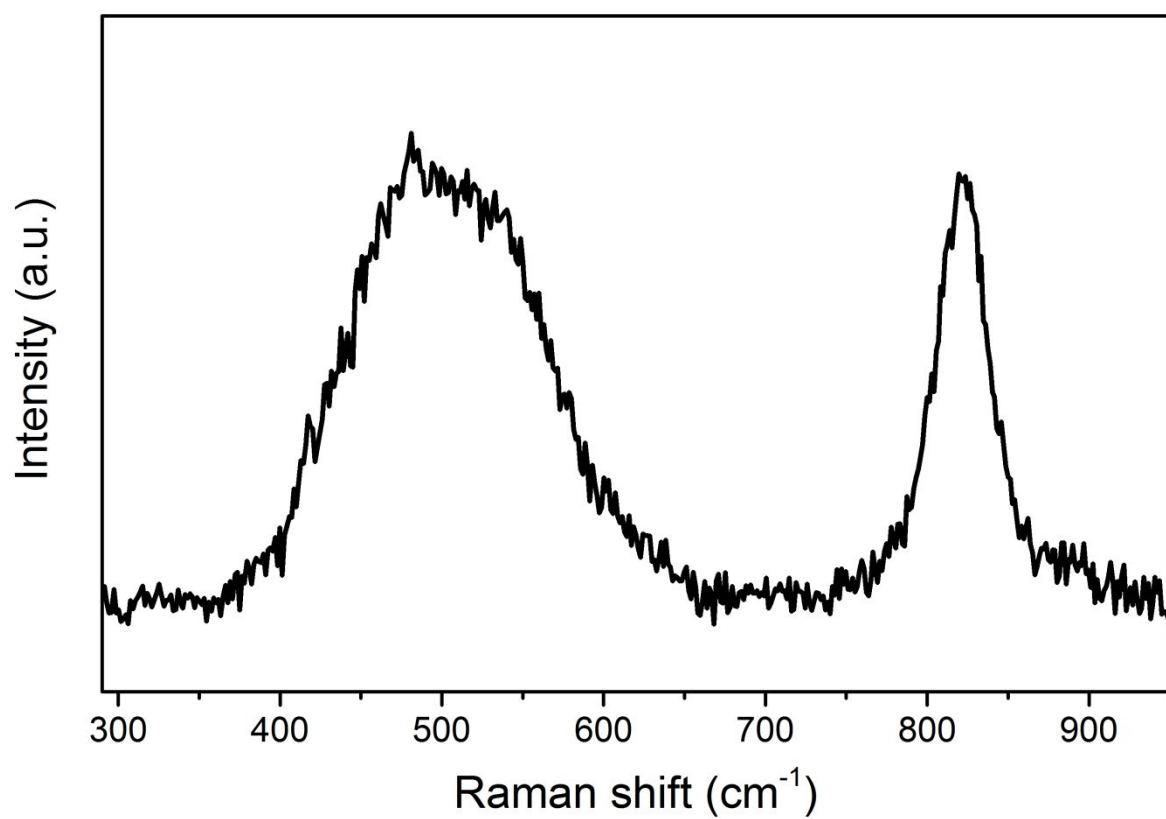

**Figure S11.** Raman spectrum of SPE-Au25 substrate after storing in ambient condition for 10 days.
